# Supplementary material
Source: PubMed Central journal article supplement (PMC7571800)
Supplement: NIHMS1569327-supplement-1.pdf [file NIHMS1569327-supplement-1.pdf]

## **Supplemental Information**

### **A Dimeric Structural Scaffold for PRC2-PCL Targeting to CpG Island Chromatin**

**Siming Chen, Lianying Jiao, Xiuli Liu, Xin Yang, Xin Liu**

**Fig. S1 (related to Fig. 1)**

**A**

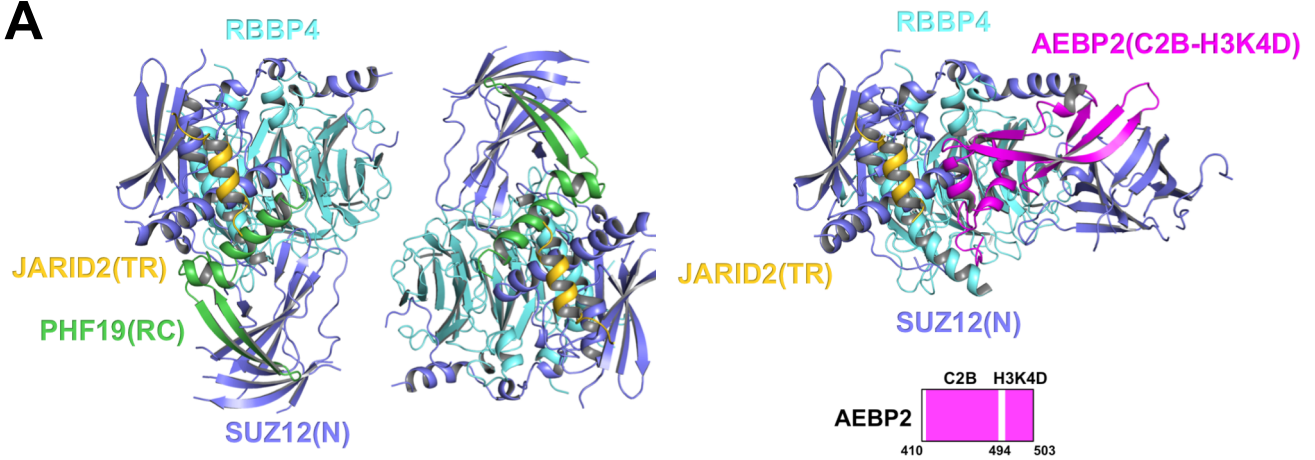

**B**

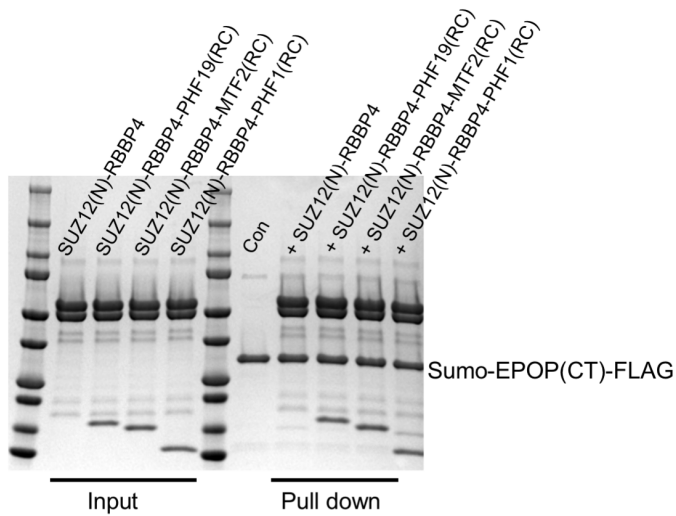

**C**

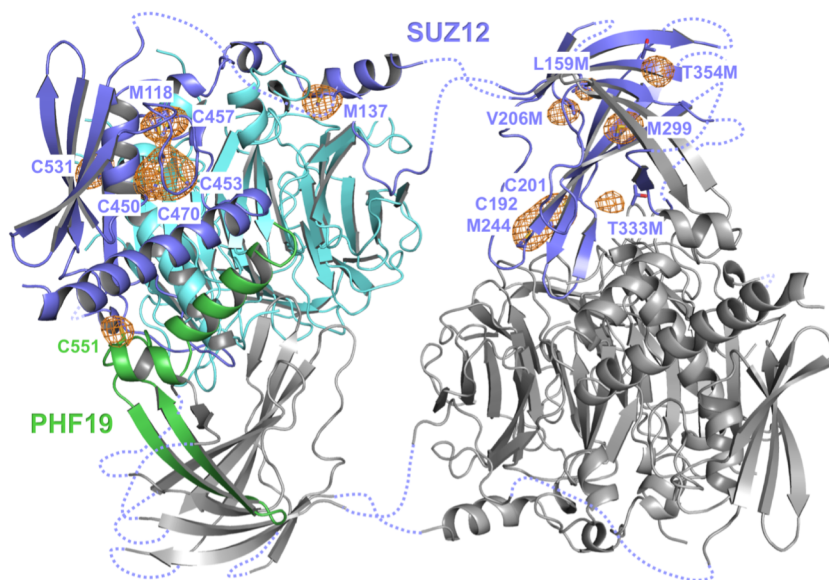

**Fig. S1 Crystal structure analysis of SUZ12(N)-RBBP4-PHF19(RC)-JARID2(TR)**

**(A) Structural comparison of the SUZ12(N)-RBBP4-AEBP2(C2B-H3K4D)-JARID2(TR) and SUZ12(N)-RBBP4-PHF19(RC)-JARID2(TR) complexes**

Different proteins are color-coded and labeled. Two complexes are oriented similarly for comparison. The JARID2(TR) in yellow occupies the same surface on the SUZ12(N)-RBBP4 protein body in the two structures, and has little crosstalk with the AEBP2(C2B-H3K4D) in magenta (lower panel) or the PHF19(RC) in green (upper panel). Domain structure of AEBP2 is also provided. "C2B" stands for C2-Binding and "H3K4D" stands for H3K4 Displacement.

**(B) Reconstitution of the SUZ12(N)-RBBP4-PHF19(RC)-EPOP(CT) complex**

The complex was reconstituted by mixing a FLAG-tagged EPOP(CT) corresponding to residues 285-379 with the purified ternary complexes, including SUZ12(N)-RBBP4-PHF1(RC), SUZ12(N)-RBBP4-MTF2(RC) and SUZ12(N)-RBBP4-PHF19(RC). Anti-FLAG resin IP indicated stoichiometric binding in all cases. Coomassie blue staining of a SDS-PAGE gel is shown.

**(C) SAD signals used for model building and validation**

A total of sixteen sulfur atoms from both endogenous residues or designed methionine mutants of SUZ12 and PHF19 were located.

**Fig. S2 (related to Fig. 2)**

**A**

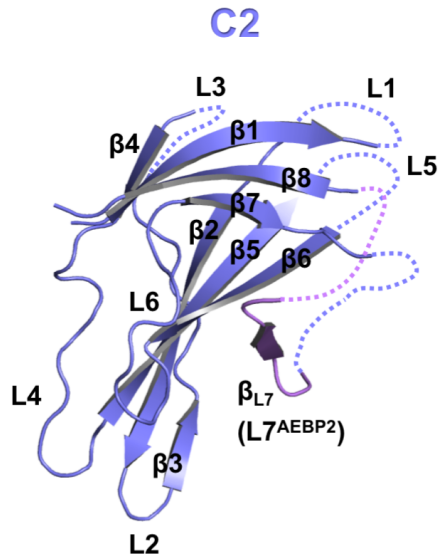

**B**

**SUZ12(C2)**

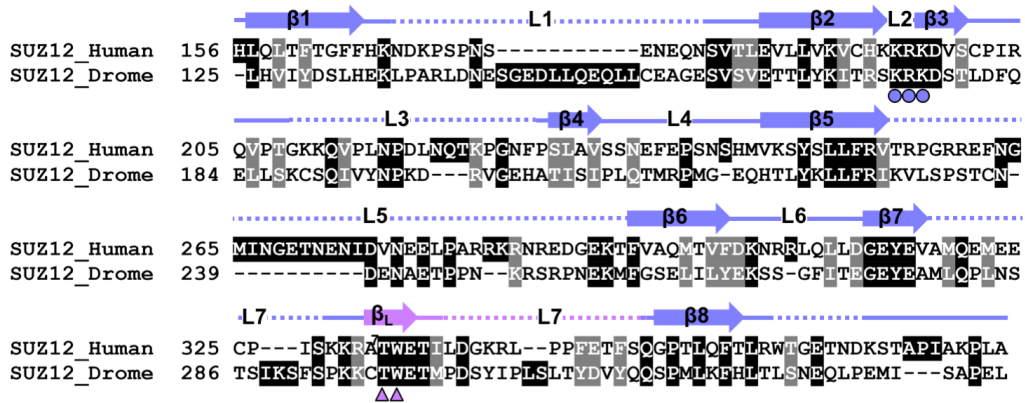

**SUZ12(WDB2)**

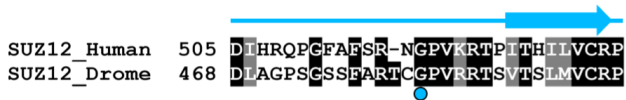

**Fig. S2 Structure of the SUZ12(C2) and sequence of the SUZ12(C2) and the SUZ12(WDB2)**

**(A) Structure of the C2 domain**

Zoom-in view of the C2 domain of SUZ12. The L2 loop forms a major dimer interface. The L7 loop is partially folded into the  $\beta_{L7}$  strand that locks the PHF19(RC) (omitted for clarity) in the current structure. The L7 loop is disordered in the AEBP2-bound structure.

**(B) Sequence alignment of SUZ12**

The C2 and WDB2 domains of SUZ12 from humans and *Drosophila* were aligned. Residues of the C2 domain involved in RBBP4 binding are indicated by filled circles. Residues of the  $\beta_{L7}$  strand involved in PHF19 binding are indicated by filled triangles. Human RBBP4 and its homolog in *Drosophila*, CAF1 (a.k.a. NURF55), share about 90% sequence identifies, with the SUZ12(C2)-interacting residues strictly conserved. The sequence alignment of RBBP4 and CAF1 is not shown.

**Fig. S3 (related to Fig. 3)**

**A**

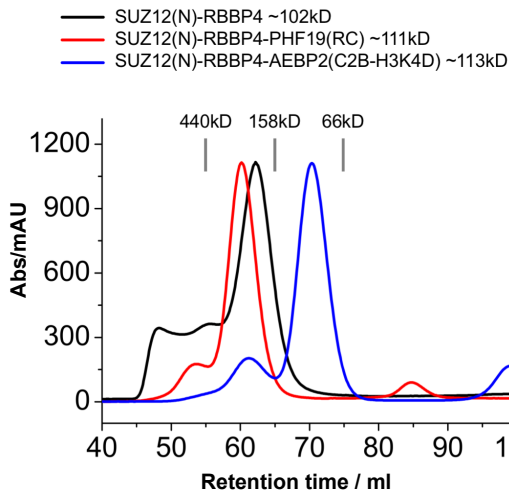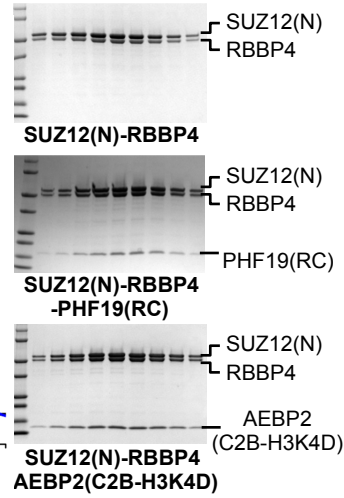

**B**

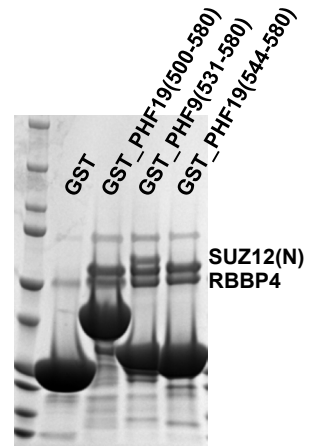

**C**

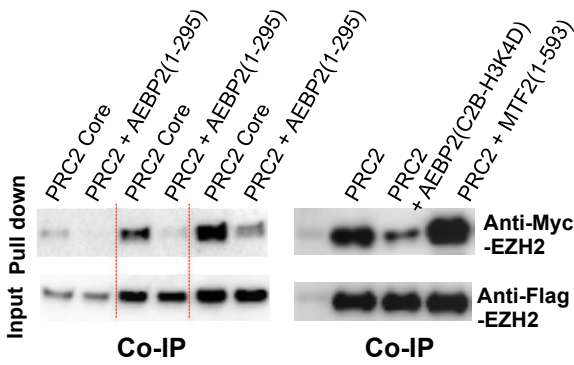

**D**

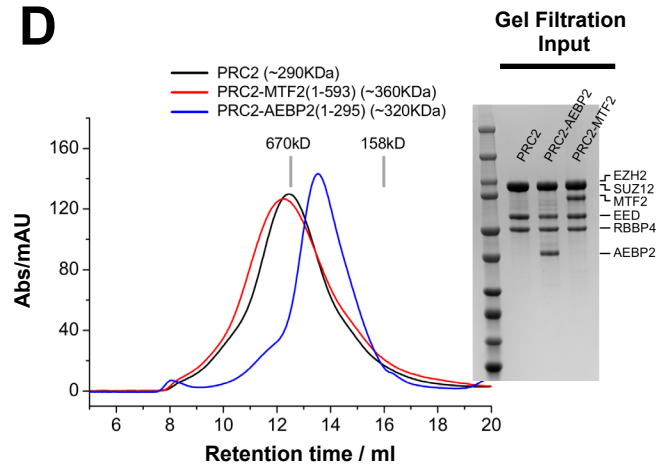

**E**

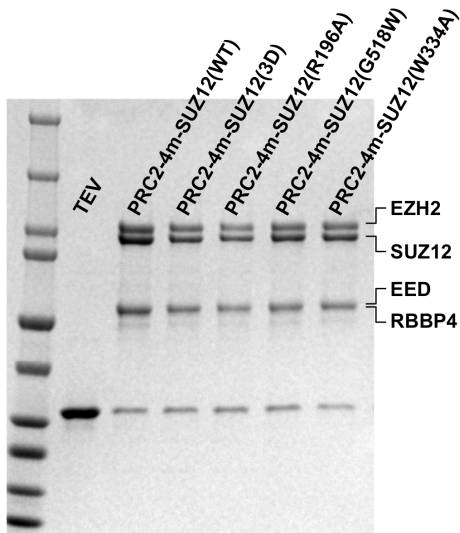

**F**

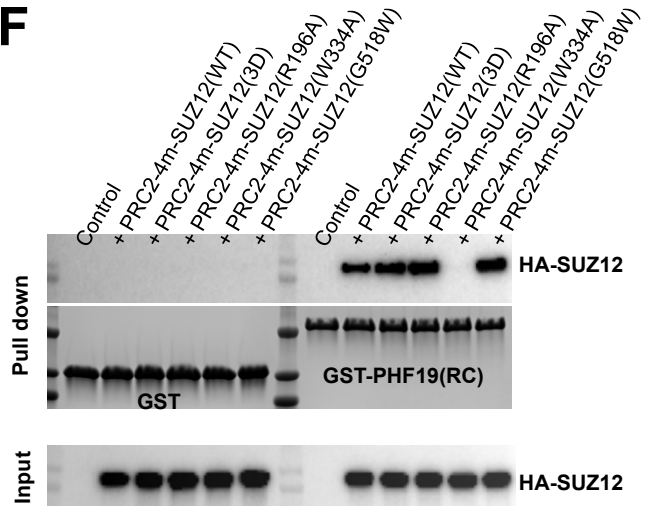

### **Fig. S3 Biochemical analysis of the PRC2 dimer**

#### **(A) SEC elution profiles of SUZ12(N)-RBBP4 bound to the AEBP2(C2B-H3K4D) fragment or the PHF19(RC) fragment**

Calculated molecular weights of SUZ12(N)-RBBP4, SUZ12(N)-RBBP4\_AEBP2(C2B-H3K4D) and SUZ12(N)-RBBP4-PHF19(RC) are indicated. SDS-PAGE gels corresponding to SEC fractions are shown. SUZ12(N)-RBBP4 and SUZ12(N)-RBBP4-PHF19(RC) behaved as dimers and SUZ12(N)-RBBP4-AEBP2(C2B-H3K4D) behaved as a monomer.

#### **(B) SUZ12(N)-RBBP4 binding by PHF19(RC)**

GST-tagged PHF19(RC) (residues 500-580) and truncation variants were used to pull down SUZ12(N)-RBBP4. Residues 531-580 were revealed in the current crystal structure. The DS helix was deleted in the construct containing residues 544-580. The DS helix of PHF19 was not essential for SUZ12(N)-RBBP4 binding.

#### **(C) Disruption and stabilization of PRC2-4m dimer by full-length AEBP2 and MTF2**

Co-IP was used to assess the extent of dimer formation. PRC2-4m containing both FLAG-tagged EZH2 and Myc-tagged EZH2 was purified from HEK293T cells through transient expression. Equal amounts of PRC2-4m were subjected to dimer disruption and stabilization by full-length AEBP2 (residues 1-295) (left) and full-length MTF2 (residues 1-593) (right), respectively. Anti-FLAG-EZH2 IP captured Myc-EZH2 through PRC2 dimerization, which was eluted by FLAG peptide. Anti-Myc Western signals represented the extent of PRC2 dimerization. Left: increasing amounts of Co-IP samples (1×, 2× and 4×) were loaded. Right: the AEBP2(C2B-H3K4D) fragment was used as a control that disrupted the intrinsic PRC2 dimer.

#### **(D) SEC elution profiles of PRC2, PRC2-MTF2 and PRC2-AEBP2**

Purity of the three complexes prior to SEC was assessed by SDS-PAGE gel. SEC elution profiles were compared. Calculated molecular weights of the complexes are indicated.

#### **(E) Purification of the WT and mutant PRC2 core complexes**

Purity of the WT and mutant PRC2 core complexes used for dimer formation Co-IP assay was assessed by SDS-PAGE.

#### **(F) PHF19(RC) binding by the WT and mutant PRC2 core complexes**

GST-tagged PHF19(RC) was used to pull down the purified PRC2 core complexes. Bound PRC2 was assessed by anti-HA Western blot signals from HA-SUZ12. Different from other mutations of SUZ12, the W334A mutation disrupted PHF19(RC) binding to the PRC2 core complex.

**Fig. S4 (related to Fig. 4)**

**A**

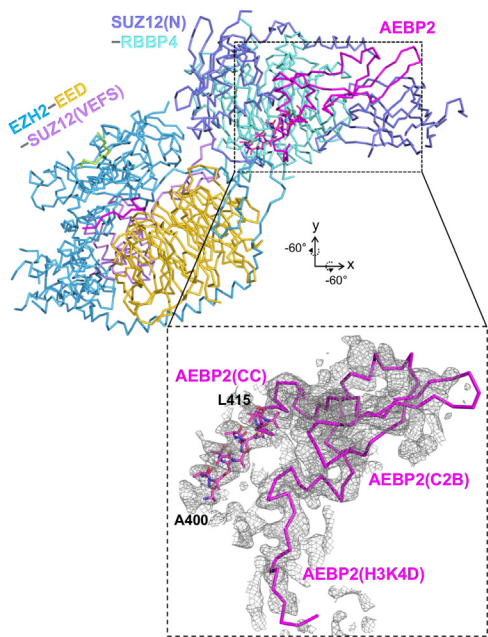

**B**

| hAEBP2 <sup>partial</sup>   |   | ID |                                                             |
|-----------------------------|---|----|-------------------------------------------------------------|
| hAEBP2 <sup>partial</sup>   | 1 | 1  | MAAAITDMADLEELSRLSPLIPGSPGSAARGRAEPPPEEEEEEEDEEEAEAEVAALLLN |
| hAEBP2 <sup>isoform 1</sup> | 1 | 1  | MAAAITDMADLEELSRLSPLIPGSPGSAARGRAEPPPEEEEEEEDEEEAEAEVAALLLN |
| hAEBP2 <sup>isoform 2</sup> | 1 | 1  | MAAAITDMADLEELSRLSPLIPGSPGSAARGRAEPPPEEEEEEEDEEEAEAEVAALLLN |
| hAEBP2 <sup>isoform 3</sup> | 1 | 1  | MAAAITDMADLEELSRLSPLIPGSPGSAARGRAEPPPEEEEEEEDEEEAEAEVAALLLN |

  

| hAEBP2 <sup>partial</sup>   |    | ID |                                                             |
|-----------------------------|----|----|-------------------------------------------------------------|
| hAEBP2 <sup>partial</sup>   | 1  | 1  | GGSGGGGGGGGGVGGGEAETMSEFPESASQACDEDEDEDEDEDEDEDESSSSGGGEEES |
| hAEBP2 <sup>isoform 1</sup> | 61 | 61 | GGSGGGGGGGGGVGGGEAETMSEFPESASQACDEDEDEDEDEDEDEDESSSSGGGEEES |
| hAEBP2 <sup>isoform 2</sup> | 61 | 61 | GGSGGGGGGGGGVGGGEAETMSEFPESASQACDEDEDEDEDEDEDEDESSSSGGGEEES |
| hAEBP2 <sup>isoform 3</sup> | 1  | 1  | GGSGGGGGGGGGVGGGEAETMSEFPESASQACDEDEDEDEDEDEDEDESSSSGGGEEES |

  

| hAEBP2 <sup>partial</sup>   |     | ID  |                                                           |
|-----------------------------|-----|-----|-----------------------------------------------------------|
| hAEBP2 <sup>partial</sup>   | 1   | 1   | SAESLVGSS--GGSSSDETRSLSPGAASSSSGDDGDKGLEEPKGRGSGG--GGGGSS |
| hAEBP2 <sup>isoform 1</sup> | 121 | 121 | SAESLVGSS--GGSSSDETRSLSPGAASSSSGDDGDKGLEEPKGRGSGG--GGGGSS |
| hAEBP2 <sup>isoform 2</sup> | 121 | 121 | SAESLVGSS--GGSSSDETRSLSPGAASSSSGDDGDKGLEEPKGRGSGG--GGGGSS |
| hAEBP2 <sup>isoform 3</sup> | 1   | 1   | SAESLVGSS--GGSSSDETRSLSPGAASSSSGDDGDKGLEEPKGRGSGG--GGGGSS |

  

| hAEBP2 <sup>partial</sup>   |     | ID  |                                                         |
|-----------------------------|-----|-----|---------------------------------------------------------|
| hAEBP2 <sup>partial</sup>   | 1   | 1   | MSSDGEPLSRMSEDSISSTIMVDSTI                              |
| hAEBP2 <sup>isoform 1</sup> | 177 | 177 | SSSVVSSGGDEGYGTGGGSSATSGGRGSLMSSDGEPLSRMSEDSISSTIMVDSTI |
| hAEBP2 <sup>isoform 2</sup> | 177 | 177 | SSSVVSSGGDEGYGTGGGSSATSGGRGSLMSSDGEPLSRMSEDSISSTIMVDSTI |
| hAEBP2 <sup>isoform 3</sup> | 1   | 1   | SSSVVSSGGDEGYGTGGGSSATSGGRGSLMSSDGEPLSRMSEDSISSTIMVDSTI |

  

| hAEBP2 <sup>partial</sup>   |     | Zn  |                                                          |
|-----------------------------|-----|-----|----------------------------------------------------------|
| hAEBP2 <sup>partial</sup>   | 29  | 29  | SSGRSTPAMNQGSGSTSSSKNIAYNCWQDQACFNSSPDLADHRSIHVDGQRGGVFF |
| hAEBP2 <sup>isoform 1</sup> | 237 | 237 | SSGRSTPAMNQGSGSTSSSKNIAYNCWQDQACFNSSPDLADHRSIHVDGQRGGVFF |
| hAEBP2 <sup>isoform 2</sup> | 237 | 237 | SSGRSTPAMNQGSGSTSSSKNIAYNCWQDQACFNSSPDLADHRSIHVDGQRGGVFF |
| hAEBP2 <sup>isoform 3</sup> | 21  | 21  | SSGRSTPAMNQGSGSTSSSKNIAYNCWQDQACFNSSPDLADHRSIHVDGQRGGVFF |

  

| hAEBP2 <sup>partial</sup>   |     | Zn  |                                                              |
|-----------------------------|-----|-----|--------------------------------------------------------------|
| hAEBP2 <sup>partial</sup>   | 89  | 89  | CLWKGCKVYNTPSTSQSWLQRHMLTHSGDKPFKCVVGGCNASFASQGLLARHVPTHFSGQ |
| hAEBP2 <sup>isoform 1</sup> | 297 | 297 | CLWKGCKVYNTPSTSQSWLQRHMLTHSGDKPFKCVVGGCNASFASQGLLARHVPTHFSGQ |
| hAEBP2 <sup>isoform 2</sup> | 297 | 297 | CLWKGCKVYNTPSTSQSWLQRHMLTHSGDKPFKCVVGGCNASFASQGLLARHVPTHFSGQ |
| hAEBP2 <sup>isoform 3</sup> | 81  | 81  | CLWKGCKVYNTPSTSQSWLQRHMLTHSGDKPFKCVVGGCNASFASQGLLARHVPTHFSGQ |

  

| hAEBP2 <sup>partial</sup>   |     | CC  |                                                           |
|-----------------------------|-----|-----|-----------------------------------------------------------|
| hAEBP2 <sup>partial</sup>   | 149 | 149 | NSSKVSQPKAKEESPSKAGMNRKRLKNKRRRSLRPHDFDFAQRLDAIRHRAICFNLS |
| hAEBP2 <sup>isoform 1</sup> | 357 | 357 | NSSKVSQPKAKEESPSKAGMNRKRLKNKRRRSLRPHDFDFAQRLDAIRHRAICFNLS |
| hAEBP2 <sup>isoform 2</sup> | 357 | 357 | NSSKVSQPKAKEESPSKAGMNRKRLKNKRRRSLRPHDFDFAQRLDAIRHRAICFNLS |
| hAEBP2 <sup>isoform 3</sup> | 141 | 141 | NSSKVSQPKAKEESPSKAGMNRKRLKNKRRRSLRPHDFDFAQRLDAIRHRAICFNLS |

  

| hAEBP2 <sup>partial</sup>   |     | C2B |                                                            |
|-----------------------------|-----|-----|------------------------------------------------------------|
| hAEBP2 <sup>partial</sup>   | 209 | 209 | AHIESLKGHSVVFHSTVIARKKEDSGIKLLLHWMPEDILPDVWVNESERHQLKTKVVH |
| hAEBP2 <sup>isoform 1</sup> | 417 | 417 | AHIESLKGHSVVFHSTVIARKKEDSGIKLLLHWMPEDILPDVWVNESERHQLKTKVVH |
| hAEBP2 <sup>isoform 2</sup> | 417 | 417 | AHIESLKGHSVVFHSTVIARKKEDSGIKLLLHWMPEDILPDVWVNESERHQLKTKVVH |
| hAEBP2 <sup>isoform 3</sup> | 201 | 201 | AHIESLKGHSVVFHSTVIARKKEDSGIKLLLHWMPEDILPDVWVNESERHQLKTKVVH |

  

| hAEBP2 <sup>partial</sup>   |     | C2B |                            | H3K4D |                            |
|-----------------------------|-----|-----|----------------------------|-------|----------------------------|
| hAEBP2 <sup>partial</sup>   | 269 | 269 | LSKLPKDTALLLDPNIYRTMPQRLKR | 269   | LSKLPKDTALLLDPNIYRTMPQRLKR |
| hAEBP2 <sup>isoform 1</sup> | 477 | 477 | LSKLPKDTALLLDPNIYRTMPQRLKR | 477   | LSKLPKDTALLLDPNIYRTMPQRLKR |
| hAEBP2 <sup>isoform 2</sup> | 477 | 477 | LSKLPKDTALLLDPNIYRTMPQRLKR | 477   | LSKLPKDTALLLDPNIYRTMPQRLKR |
| hAEBP2 <sup>isoform 3</sup> | 261 | 261 | LSKLPKDTALLLDPNIYRTMPQRLKR | 261   | LSKLPKDTALLLDPNIYRTMPQRLKR |

**C**

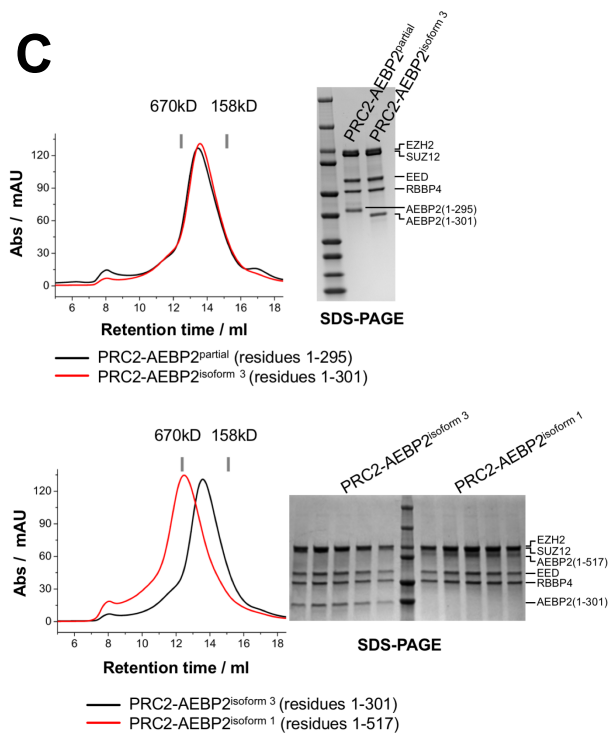

**D**

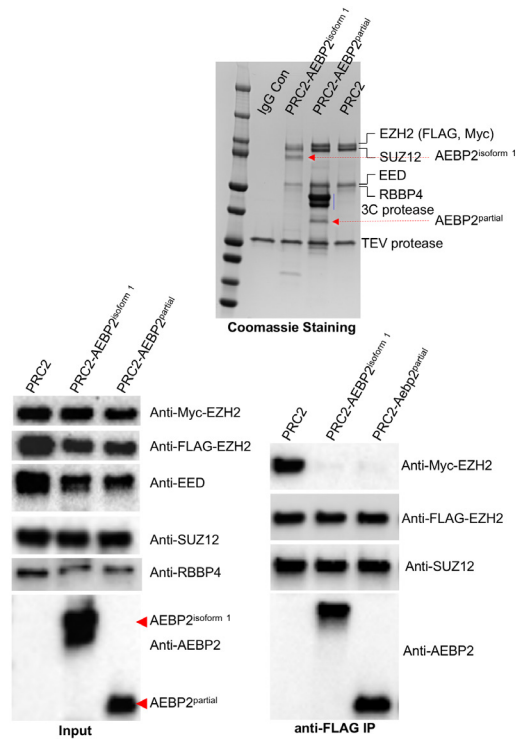



## **Fig. S4 Structural and biochemical analysis of PRC2-AEBP2**

### **(A) Fitting of the crystal structure into the cryo-EM density map**

The crystal structure of SUZ12(N)-RBBP4-AEBP2(C2B-H3K4D)-JARID2(TR) from PDB 5WAI was fitted into the cryo-EM map of a PRC2-AEBP2-JARID2 holo complex. The AEBP2(CC) helix that was missing in the crystal structure was built as a polyalanine model based on the cryo-EM density map EMD-7334 and is shown as sticks. The estimated registers of the AEBP2(CC) are indicated.

### **(B) Sequence alignment of different versions of AEBP2 used in literatures and from UniProt database**

Four versions of human AEBP2 were aligned, including AEBP2<sup>partial</sup> (residues 1-295), AEBP2<sup>isoform 1</sup> (residues 1-517), AEBP2<sup>isoform 2</sup> (residues 1-503) and AEBP2<sup>isoform 3</sup> (residues 1-301). Various functional domains of AEBP2 are indicated as below: ID = Intrinsically Disordered; Zn = Zinc finger, CC = Central Connecting; C2B = C2-Binding; H3K4D = H3K4 Displacement.

### **(C) SEC elution profiles of PRC2-AEBP2<sup>isoform 1</sup>, PRC2-AEBP2<sup>isoform 3</sup> and PRC2-AEBP2<sup>partial</sup>**

SEC elution profiles were compared in pairs. Protein quality was assessed by SDS-PAGE. AEBP2<sup>isoform 1</sup> = 2×StrepII-AEBP2 (1-517)-3C-FLAG; PRC2-AEBP2<sup>isoform 3</sup> = 2×StrepII-AEBP2(1-301); AEBP2<sup>partial</sup> = 2×StrepII-3C-Aebp2(1-295)-His<sub>6</sub>.

### **(D) PRC2 dimerization Co-IP assay in the presence of AEBP2<sup>partial</sup> (residues 1-295) and AEBP2<sup>isoform 1</sup> (residues 1-517)**

The PRC2 core complex and the AEBP2-containing PRC2 core complexes were purified from HEK293T cells that transiently coexpressed the corresponding protein subunits. Purified complexes were assessed by SDS-PAGE (upper panel). Input complexes were checked by Western blot using anti-FLAG (FLAG-EZH2), anti-Myc (Myc-EZH2), anti-EED, anti-SUZ12, anti-RBBP4 and anti-AEBP2 antibodies. The anti-AEBP2 antibody recognized both the longer and shorter versions of AEBP2 (lower left panel). Anti-Myc signals represented Myc-EZH2 captured through PRC2 dimerization during anti-FLAG IP. Both versions of AEBP2 disrupted the intrinsic PRC2 dimer under the assay buffer condition containing 50mM Tris-HCl, pH 8.0, 150mM NaCl, 10% glycerol, 0.1% NP40 and 2mM DTT.

# Fig. S5 (related to Fig. 5)

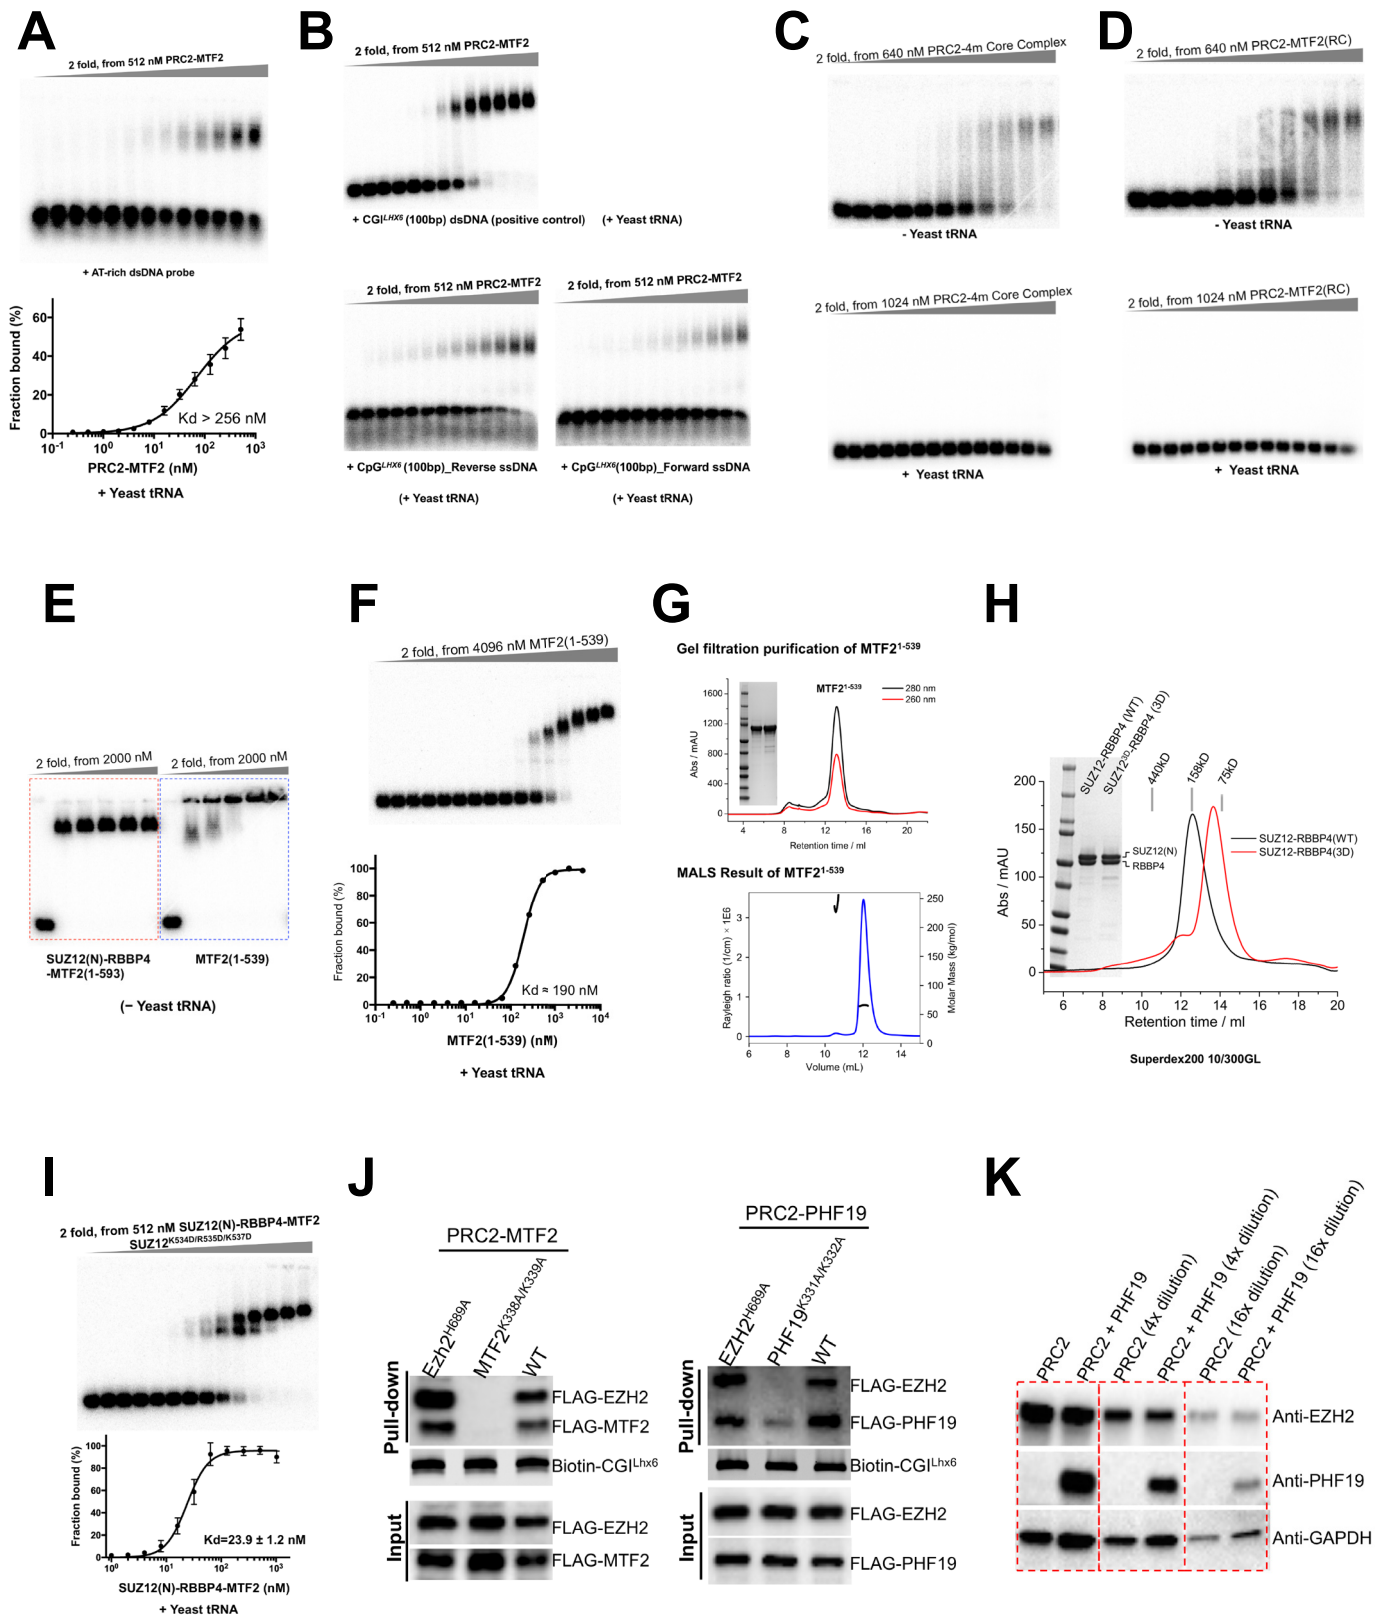

**Fig. S5 Role of PRC2 dimerization in CGI DNA binding *in vitro***

**(A) EMSA of PRC2-MTF2 binding to an AT-rich DNA probe**

EMSA using  $^{32}\text{P}$ -labeled AT-rich DNA probe was performed for three times in the presence of yeast tRNA. Binding was not saturated at 512nM of PRC2-MTF2. Sequence of the 100bp AT-rich probe is provided in the Methods section.

**(B) EMSA of PRC2-MTF2 binding to single stranded CGI<sup>LHX6</sup> DNA probes**

EMSA using  $^{32}\text{P}$ -labeled single-stranded CGI<sup>LHX6</sup> DNA probes (forward and reverse strands) was performed in the presence of yeast tRNA (lower two panels). PRC2-MTF2 binding to the double-stranded CGI<sup>LHX6</sup> probe was also performed in parallel as a positive control in the presence of yeast tRNA (upper panel).

**(C) DNA<sup>LHX6</sup> binding by the PRC2 core complex**

EMSA were performed both in the absence (upper panel) and presence (lower panel) of yeast tRNA.

**(D) DNA<sup>LHX6</sup> binding by PRC2-MTF2(RC)**

PRC2-MTF2(RC) that lacks the DNA binding domain of MTF2 was used in EMSA both in the absence (upper panel) and presence (lower panel) of yeast tRNA.

**(E) DNA<sup>LHX6</sup> binding by MTF2 lacking the RC domain in the absence of yeast tRNA**

MTF2<sup>ΔRC</sup> corresponding to residues 1-539 did not bind PRC2 and formed aggregates with the DNA probe in the absence of yeast tRNA (right panel). As a positive control, SUZ12(N)-RBBP4-MTF2 displayed specific binding to the DNA probe (left panel).

**(F) DNA<sup>LHX6</sup> binding by MTF2 lacking the RC domain in the presence of yeast tRNA**

MTF2<sup>ΔRC</sup> bound to the DNA probe specifically, but with a greatly reduced affinity in the presence of yeast tRNA. No aggregates were observed under this assay condition. In both (E) and (F), MTF2<sup>ΔRC</sup> was diluted in the binding buffer before mixing with the DNA probe.

**(G) Quality control of purified MTF2<sup>ΔRC</sup> (residues 1-539)**

The SEC profile (upper panel) and SEC-MALS result (lower panel) were shown, both supporting that MTF2<sup>ΔRC</sup> (residues 1-539) used in EMSA was monodisperse.

**(H) SEC elution profiles of the WT and mutant SUZ12(N)-RBBP4**

The SEC elution profiles of WT and the K195D/R196D/K197D (3D) mutant SUZ12(N)-RBBP4 are shown. Protein purity was assessed by SDS-PAGE.

**(I) EMSA of CGI<sup>LHX6</sup> DNA probe binding by SUZ12(N)-RBBP4-MTF2 containing a control charge reversal mutant of SUZ12**

The K534D/R535D/K537D mutant of SUZ12 was used in DNA binding in the context of SUZ12(N)-RBBP4-MTF2. EMSA was performed for three times in the presence of yeast tRNA. The binding affinity was measured to be 23.9nM, comparable to the WT complex (refer to Fig. 5E).

**(J) Biotinylated CGI<sup>LHX6</sup> DNA pull-down of mutant PRC2-MTF2 and PRC2-PHF19 complexes**

Two types of mutations were assayed, including a DNA binding defective double mutation of MTF2 and PHF19 (MTF2<sup>K338A/K339A</sup> and PHF19<sup>K331A/K332A</sup>) and an enzyme inactivating single mutation of EZH2 (EZH2<sup>H689A</sup>). DNA binding was sensitive to the former type but not the latter type of mutation, highlighting specificity of the pull-down assay. Protein input was quantitated by anti-FLAG Western signals. DNA bait was detected by SYBR Gold. The bound protein complexes were quantitated by anti-FLAG Western signals.

**(K) Expression levels of transiently expressed proteins**

PRC2 and PRC2-PHF19 were transiently expressed in HEK293T cells. Only overexpressed PHF19 in the latter case but not endogenous PHF19 in the former case was detected by an anti-PHF19 antibody. Different amounts of samples were loaded for an accurate comparison.

**Fig. S6 (related to Fig. 6)**

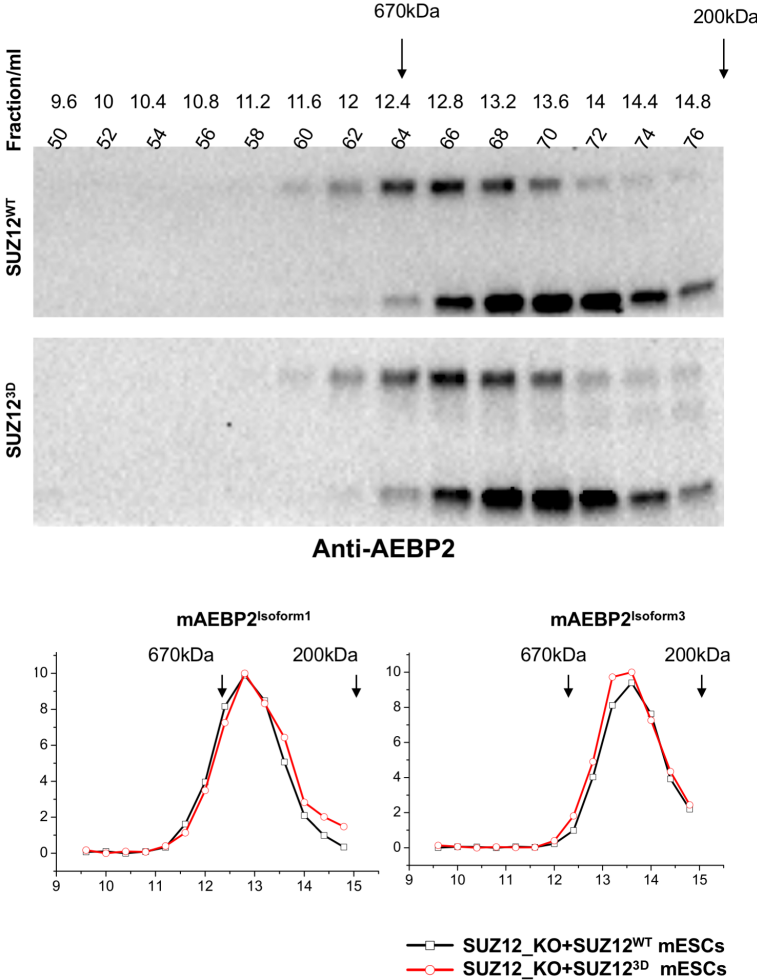

**Fig. S6 SEC profiles of endogenous mouse AEBP2 from SUZ12<sup>3D</sup> and SUZ12<sup>WT</sup> mESCs**

Both the longer (e.g. mAEBP2<sup>isoform 1</sup>) and shorter (e.g. mAEBP2<sup>isoform 3</sup>) isoforms were detected by anti-AEBP2 antibody. No difference in SEC profiles was noted between SUZ12<sup>3D</sup> and SUZ12<sup>WT</sup> mESCs. Quantification of Western blot signals for SEC fractions is provided at the bottom.

**Table S1 List of primers used for ChIP-qPCR (related to Fig. 6)**

| ChIP-qPCR primer pairs |                                    |                                    |
|------------------------|------------------------------------|------------------------------------|
| Gene name              | Forward primer sequence (5' to 3') | Reverse primer sequence (5' to 3') |
| TBX3                   | GTTCTAGCCAACCACCCTGC               | GGACAGACACACTGACCCTTTTG            |
| SATB2                  | CTCCTCCCTCACTGCCCC                 | TTCCTCTTCCCCGGTCCTAG               |
| GATA4                  | CTCTCCCGAGCTCACTTCAAGG             | GGAGAAGGTGACCTCGCACAC              |
| PAX3                   | AGAAAGGCGGAAAGAGATTAGGAC           | GAGCCAGTGAGGATGGAAAAAG             |
| FGF5                   | AGGGACGGTCAAGATTCCTT               | AGAACCAGCAGAGTCCCAGA               |
| HOXA7                  | GAGAGGTGGGCAAAGAGTGG               | CCGACAACCTCATACCTATTCCTG           |
| NANOG                  | GGCATGGTGGTAGACAAGCC               | TTAGTAAGTTGGTCCATGCTTTGG           |
| OCT4                   | CAGAGCATGGTGTAGGAGCA               | GCTGGCGGAAAGACACTAAG               |
